# Supplementary material for: Multiplexed droplet single-cell RNA-sequencing using natural genetic variation
Source: Springer Nature journal article supplement (doi:10.1038/nbt.4042), 2017-12-11
Supplement: 41587_2018_BFnbt4042_MOESM2_ESM.pdf [file 41587_2018_BFnbt4042_MOESM2_ESM.pdf]

## Supplementary Information

|                                                                                                                                                                                                                                                                                                                                               |    |
|-----------------------------------------------------------------------------------------------------------------------------------------------------------------------------------------------------------------------------------------------------------------------------------------------------------------------------------------------|----|
| Supplementary Figure 1 – Probability a given number of SNPs can uniquely assign a cell correctly to its donor given the number of samples multiplexed. Probability calculated over 100 simulated cells. Error bar determined by 10 simulation replicates. ....                                                                                | 3  |
| Supplementary Figure 2 – Number of usable singlets (triangle) and total number of cells sequenced (circle) as a function of number of individuals multiplexed at a fixed undetected doublet rate estimated from 1000 cells (1% - 10%). ....                                                                                                   | 4  |
| Supplementary Figure 3 – Cost per singlet (triangle) and per all cells (circle) as a function of number of individuals multiplexed at a fixed undetected doublet rate estimated from 1000 cells (1% - 10%). ....                                                                                                                              | 5  |
| Supplementary Figure 4 – Probability to demultiplex up to 64 unrelated individuals versus number of reads overlapping SNPs. ....                                                                                                                                                                                                              | 6  |
| Supplementary Figure 5 – Probability and error rates to detect doublets from up to 64 unrelated individuals versus number of reads overlapping SNPs. Dashed lines designate the theoretical limit for doublet detection ( $1/(1-N)$ ). ....                                                                                                   | 7  |
| Supplementary Figure 6 – Number of SNPs detected per cell (y-axis) versus number of UMIs (x-axis). ....                                                                                                                                                                                                                                       | 8  |
| Supplementary Figure 7 – Proportion of correctly assigned cells as a function of reads overlapping SNPs for 8 related individuals from 1000 Genomes. Circles represent averages over 6,145 cells downsampled to a total of 5,000, 10,000, 25,000, 50,000, 75,000 or 90,000 reads overlapping SNPs over all individuals. ....                  | 9  |
| Supplementary Figure 8 – Detection boundaries of likelihood differences between mixture model for doublets (LLK12) and singlets (SNG.LLK1). ....                                                                                                                                                                                              | 10 |
| Supplementary Figure 9 – Cell type-specific expression of single cells versus bulk. Average expression over single cells for each cell type (y-axis) versus the bulk expression of B cells, CD4+ T cells and monocytes (x-axis). Single cell averages were estimated for 8 individuals. Bulk expression was generated for 6 individuals. .... | 11 |
| Supplementary Figure 10 – Estimates of cell type proportion from three well experiment of unstimulated PBMCs. Estimates of cell type proportion for wells W1 and W2 (x-axis) versus estimates of cell type proportion for the same individuals in well W3 (y-axis). ....                                                                      | 12 |
| Supplementary Figure 11 – A. TSNE plot for wells W1, W2 and W3 separately. B. QQ plot comparing differential expression analysis between W1 and W2 with W3 for the same individuals. ....                                                                                                                                                     | 13 |
| Supplementary Figure 12 – Estimated versus observed doublet rates for unstimulated cells. Expected doublet rates for each pair of individuals (i,j) are calculated as $p_i * p_j$ , where $p_i$ and $p_j$ are the proportion of singlets individuals i and j. ....                                                                            | 14 |
| Supplementary Figure 13 – Detected doublets from the IFN-beta stimulation experiment. Red (confidently called doublets). Pink (ambiguous). Gray (singlets). ....                                                                                                                                                                              | 15 |
| Supplementary Figure 14 - Estimates of cell type proportion from unstimulated and IFN-beta stimulated PBMCs. Estimates of cell type proportion for unstimulated cells (x-axis) versus stimulated cells (y-axis) for 8 individuals. ....                                                                                                       | 16 |
| Supplementary Figure 15 – Scatter plot of estimates of cell type proportion from dscRNA-seq (x-axis) and FACS sorting (y-axis) for 6 lupus patients after IFN-beta stimulation. ....                                                                                                                                                          | 17 |

|                                                                                                                                                                                                                                                                                                                   |    |
|-------------------------------------------------------------------------------------------------------------------------------------------------------------------------------------------------------------------------------------------------------------------------------------------------------------------|----|
| Supplementary Figure 16 – Gene expression correlation between dscRNA-seq data and ImmGen mouse microarray data.....                                                                                                                                                                                               | 18 |
| Supplementary Figure 17 – Correlation of foldChange before and after IFN-beta stimulation of ~1000 expressed genes between published CD4 microarray (Ye et al., Science) and monocyte derived dendritic cells RNA-seq (Ye et al., unpublished) (y-axis) with dscRNA-seq cell type specific response (x-axis)..... | 19 |
| Supplementary Figure 18 – IFN-beta fold change correlation between dscRNA-seq data (y axis) and qPCR data from CD4+ T cells (x axis).....                                                                                                                                                                         | 20 |
| Supplementary Figure 19 – Expected versus observed variability in cell populations. Variance of average expression over single cells across 8 individuals (y) versus variance of average expression over single cells across 8 synthetic replicates matching cell number for each individual (x).....             | 21 |
| Supplementary Figure 20 – Observed variability in gene expression is correlated between batches.....                                                                                                                                                                                                              | 22 |
| Supplementary Figure 21 – Example of flow cytometry gating strategy for quantifying immune cell populations.....                                                                                                                                                                                                  | 23 |

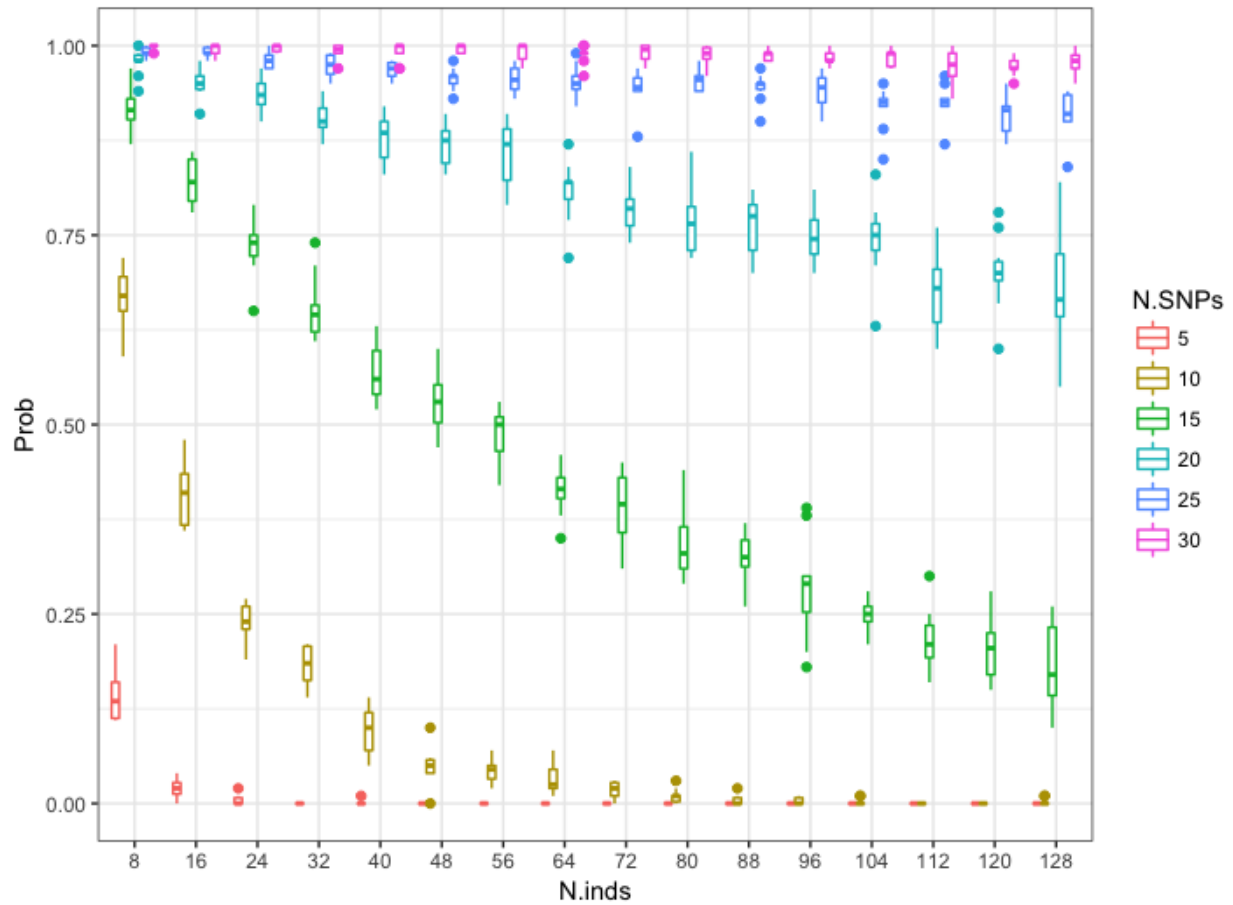

Supplementary Figure 1 – Probability a given number of SNPs can uniquely assign a cell correctly to its donor given the number of samples multiplexed. Probability calculated over 100 simulated cells. Error bar determined by 10 simulation replicates.

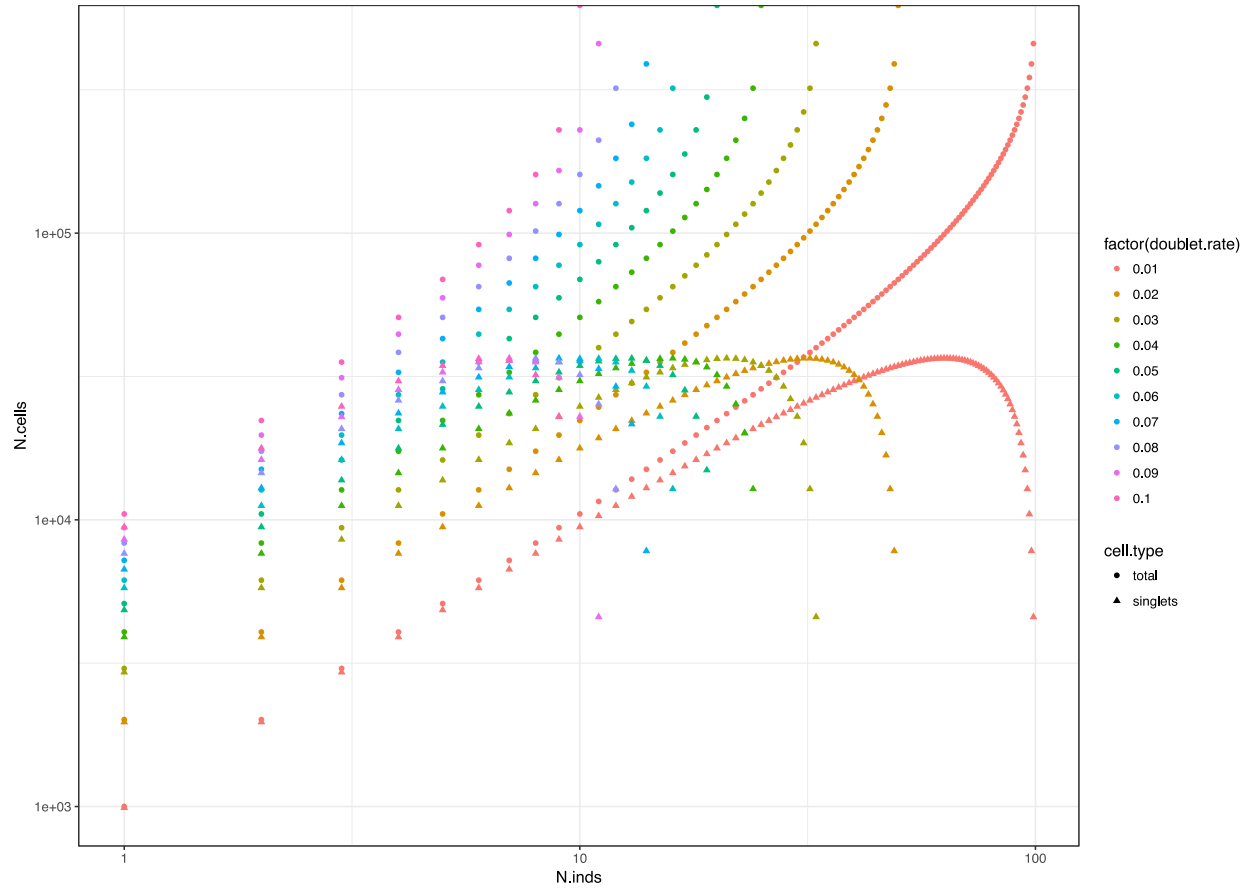

Supplementary Figure 2 – Number of usable singlets (triangle) and total number of cells sequenced (circle) as a function of number of individuals multiplexed at a fixed undetected doublet rate estimated from 1000 cells (1% - 10%).

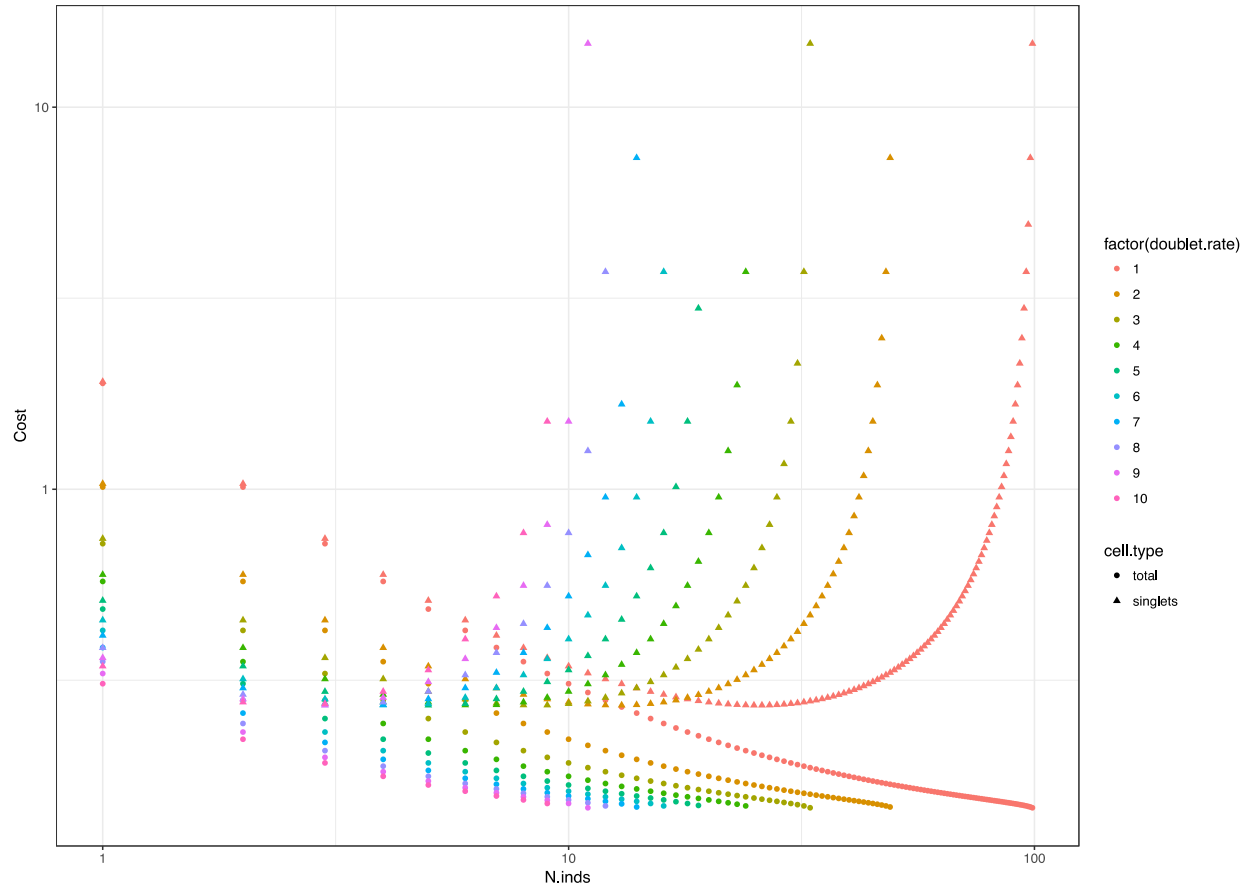

Supplementary Figure 3 – Cost per singlet (triangle) and per all cells (circle) as a function of number of individuals multiplexed at a fixed undetected doublet rate estimated from 1000 cells (1% - 10%).

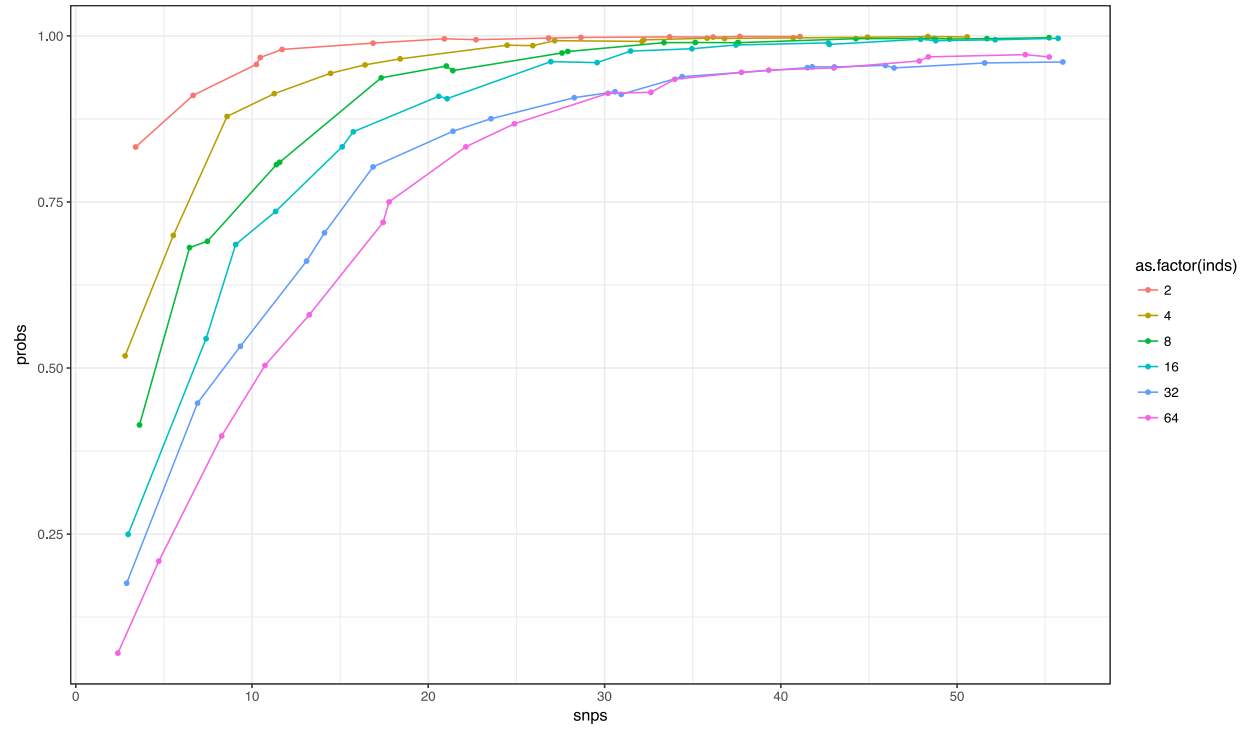

Supplementary Figure 4 – Probability to demultiplex up to 64 unrelated individuals versus number of reads overlapping SNPs.

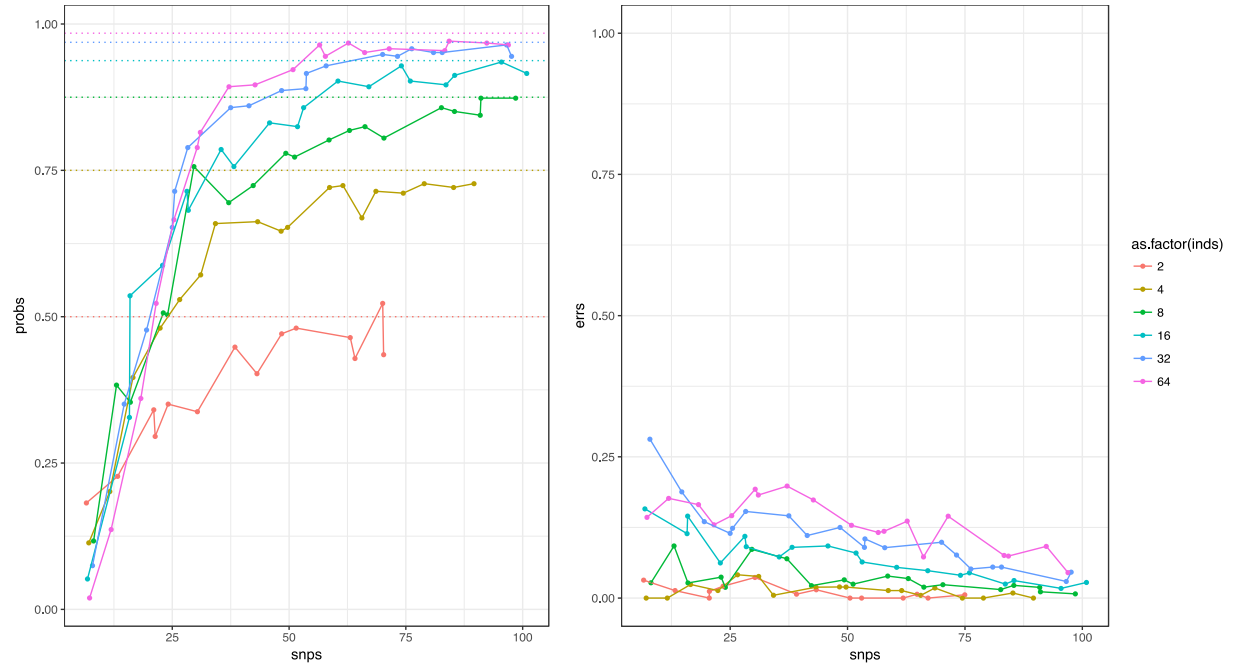

Supplementary Figure 5 – Probability and error rates to detect doublets from up to 64 unrelated individuals versus number of reads overlapping SNPs. Dashed lines designate the theoretical limit for doublet detection ( $1/(1-N)$ ).

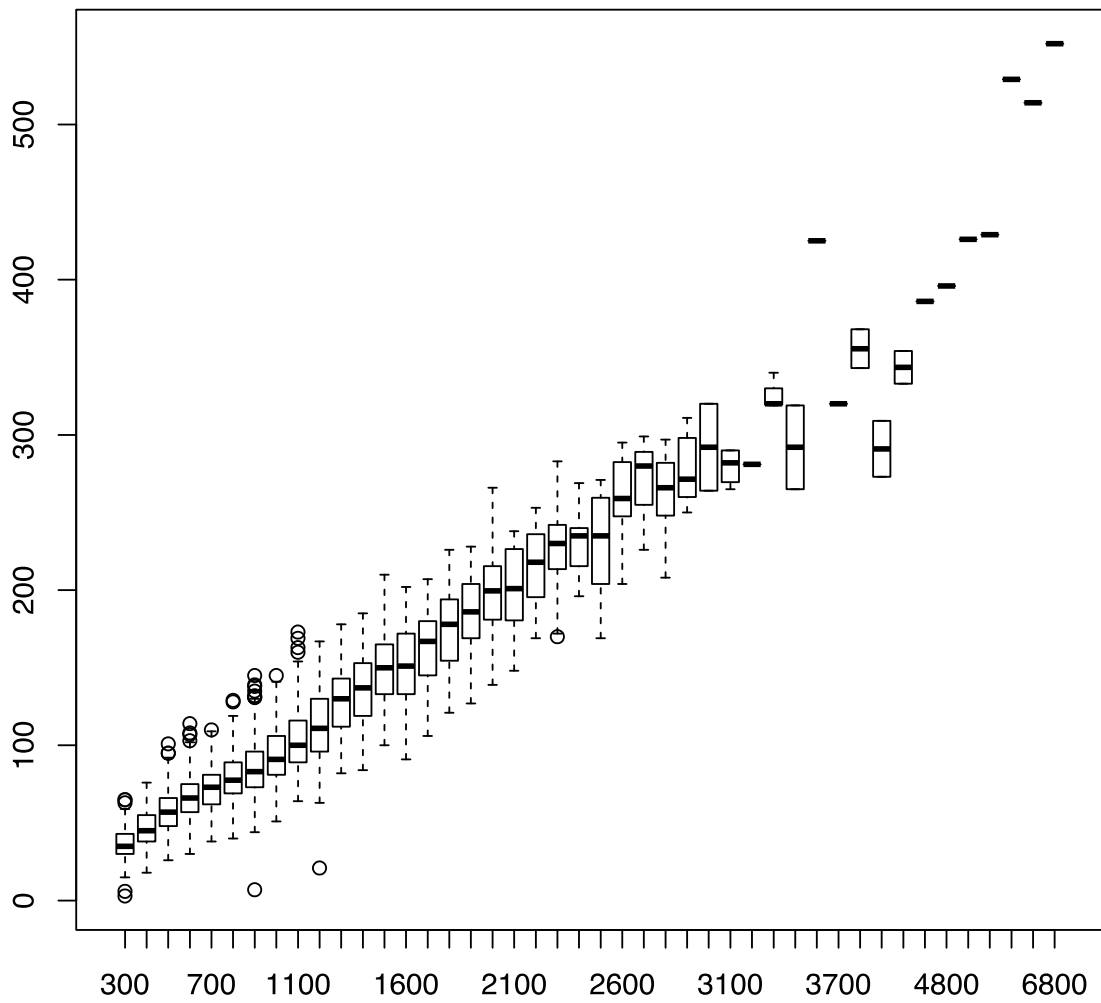

Supplementary Figure 6 –Number of SNPs detected per cell (y-axis) versus number of UMIs (x-axis).



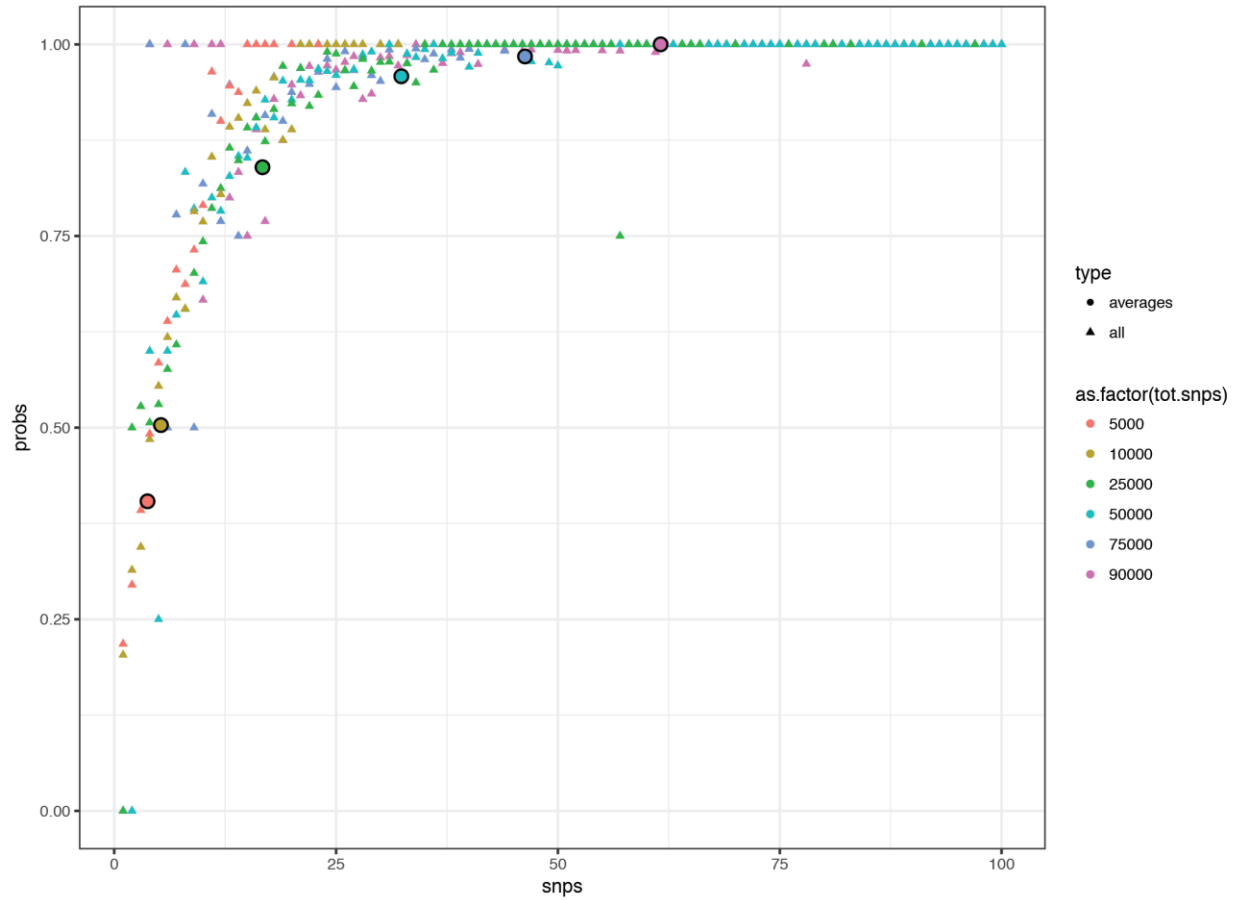

Supplementary Figure 7 – Proportion of correctly assigned cells as a function of reads overlapping SNPs for 8 related individuals from 1000 Genomes. Circles represent averages over 6,145 cells downsampled to a total of 5,000, 10,000, 25,000, 50,000, 75,000 or 90,000 reads overlapping SNPs over all individuals.

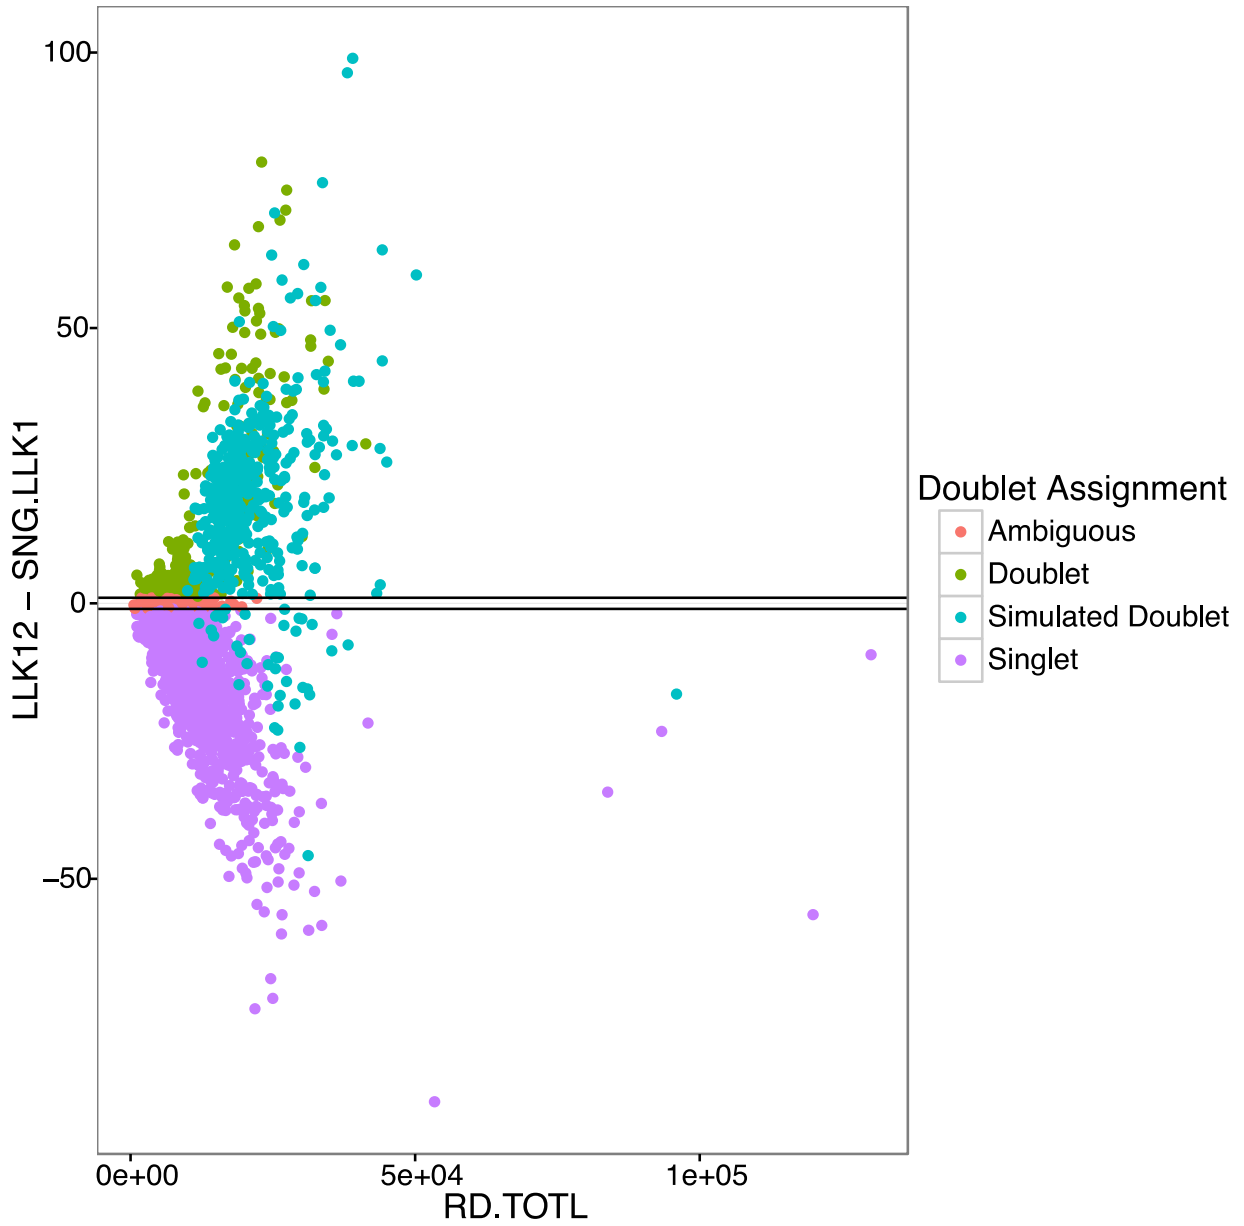

Supplementary Figure 8 – Detection boundaries of likelihood differences between mixture model for doublets (LLK12) and singlets (SNG.LLK1).



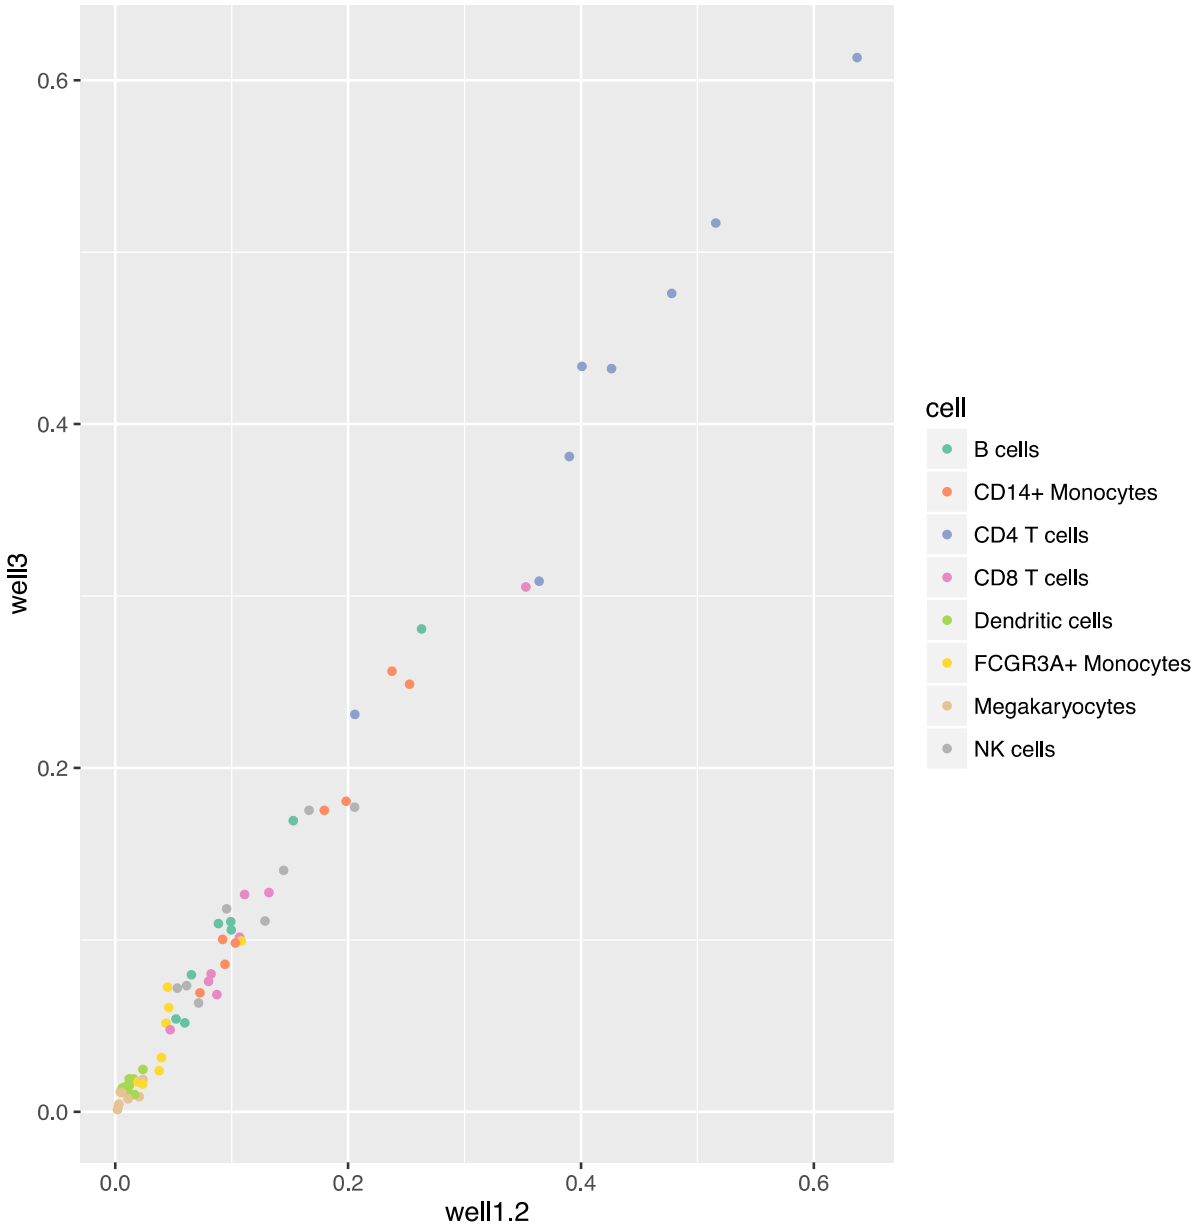

Supplementary Figure 10 – Estimates of cell type proportion from three well experiment of unstimulated PBMCs. Estimates of cell type proportion for wells W1 and W2 (x-axis) versus estimates of cell type proportion for the same individuals in well W3 (y-axis).

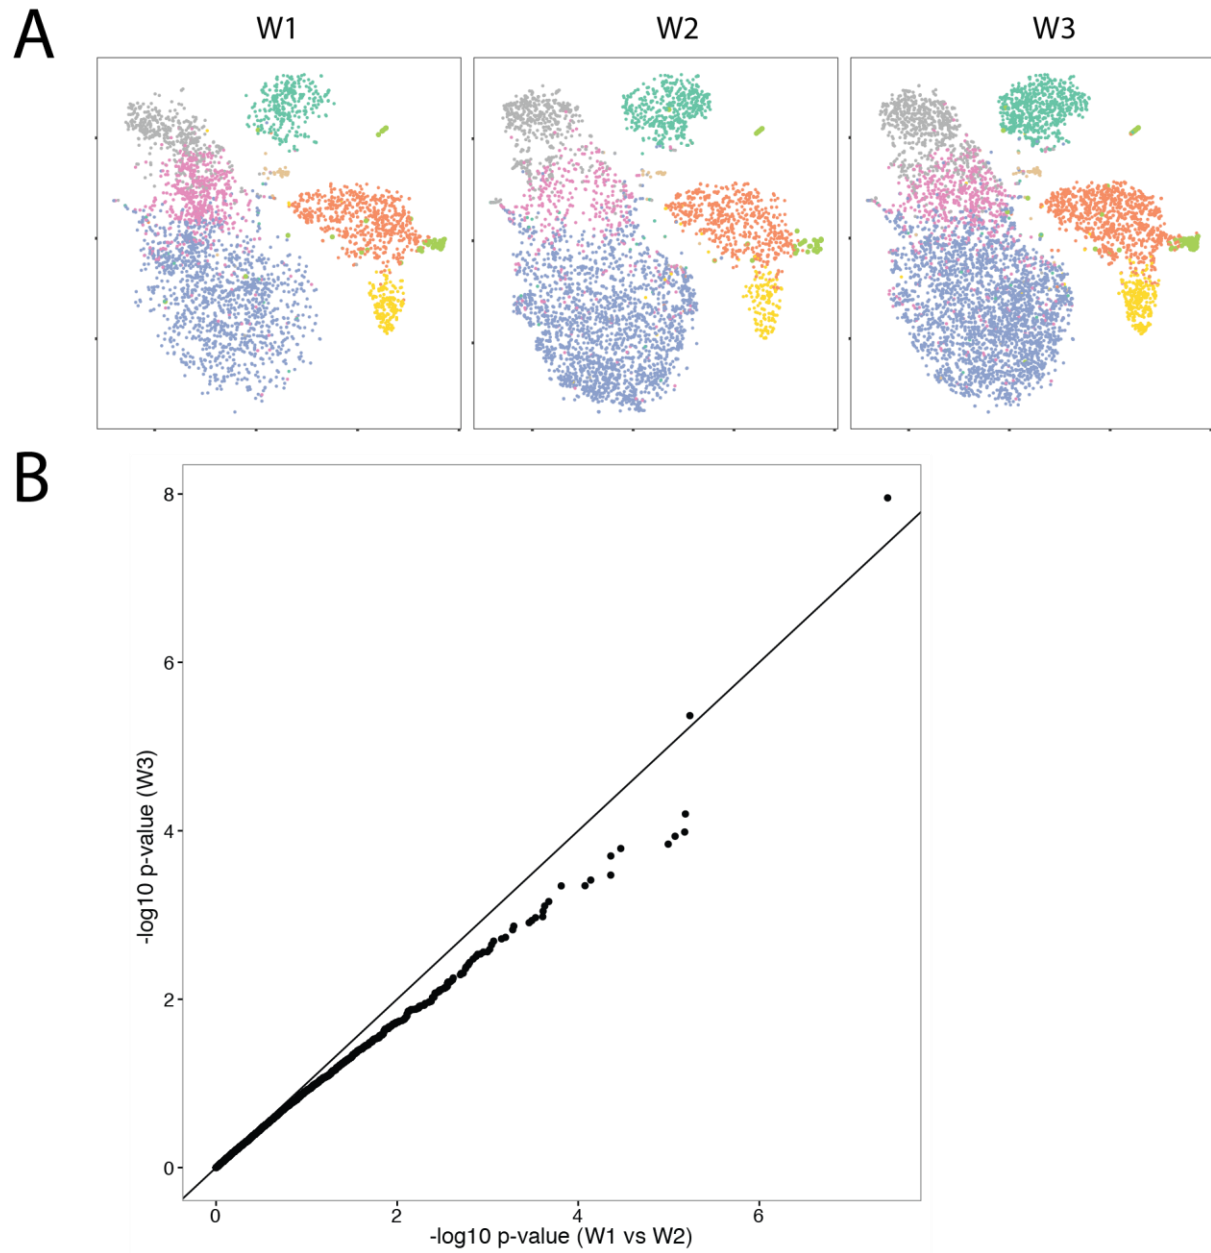

*Supplementary Figure 11* – A. TSNE plot for wells W1, W2 and W3 separately. B. QQ plot comparing differential expression analysis between W1 and W2 with W3 for the same individuals.

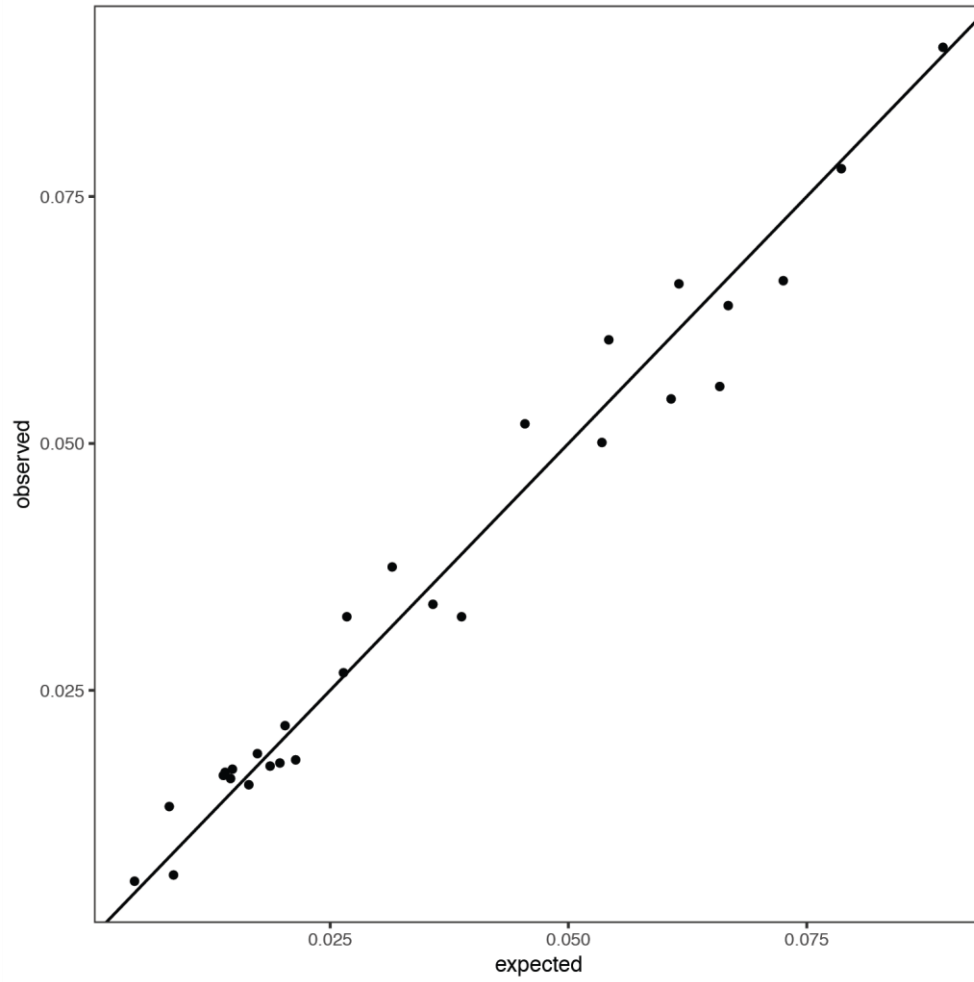

Supplementary Figure 12 – Estimated versus observed doublet rates for unstimulated cells. Expected doublet rates for each pair of individuals (i,j) are calculated as  $p_i * p_j$ , where  $p_i$  and  $p_j$  are the proportion of singlets individuals i and j.

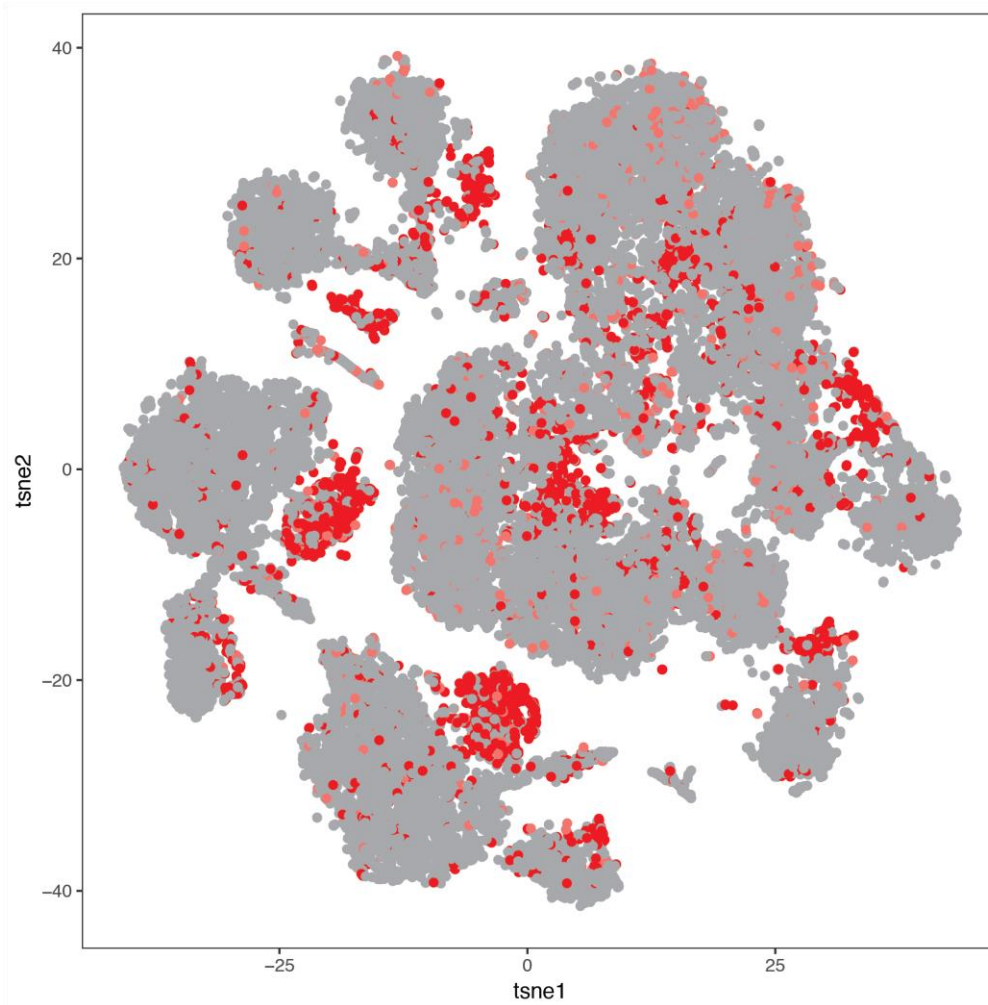

Supplementary Figure 13 – Detected doublets from the IFN-beta stimulation experiment. Red (confidently called doublets). Pink (ambiguous). Gray (singlets).

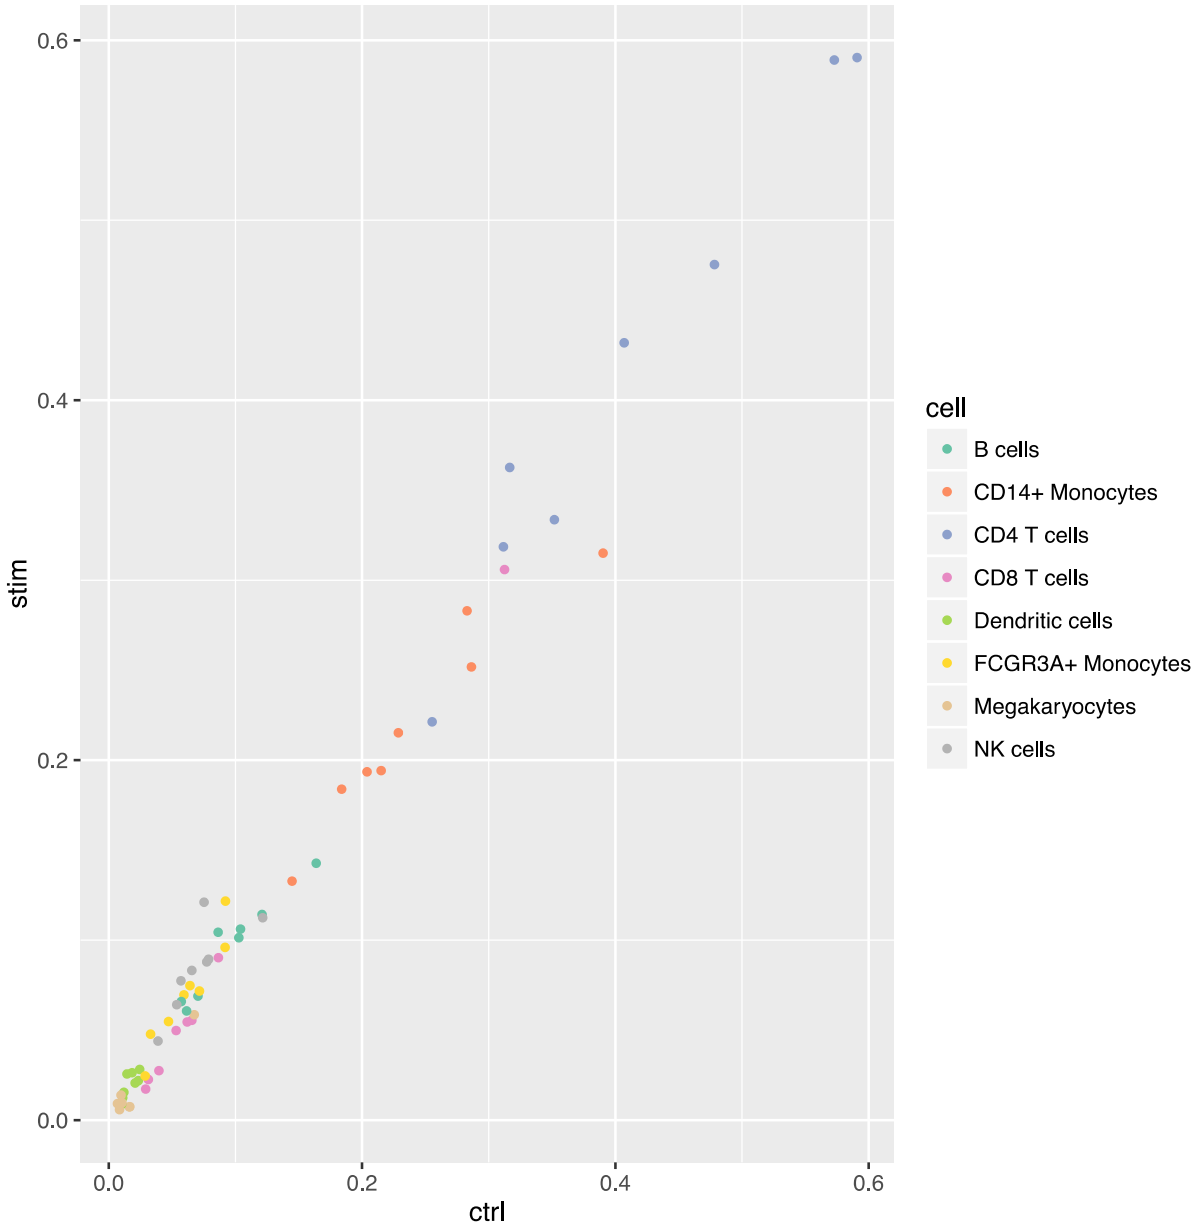

Supplementary Figure 14 - Estimates of cell type proportion from unstimulated and IFN-beta stimulated PBMCs. Estimates of cell type proportion for unstimulated cells (x-axis) versus stimulated cells (y-axis) for 8 individuals.



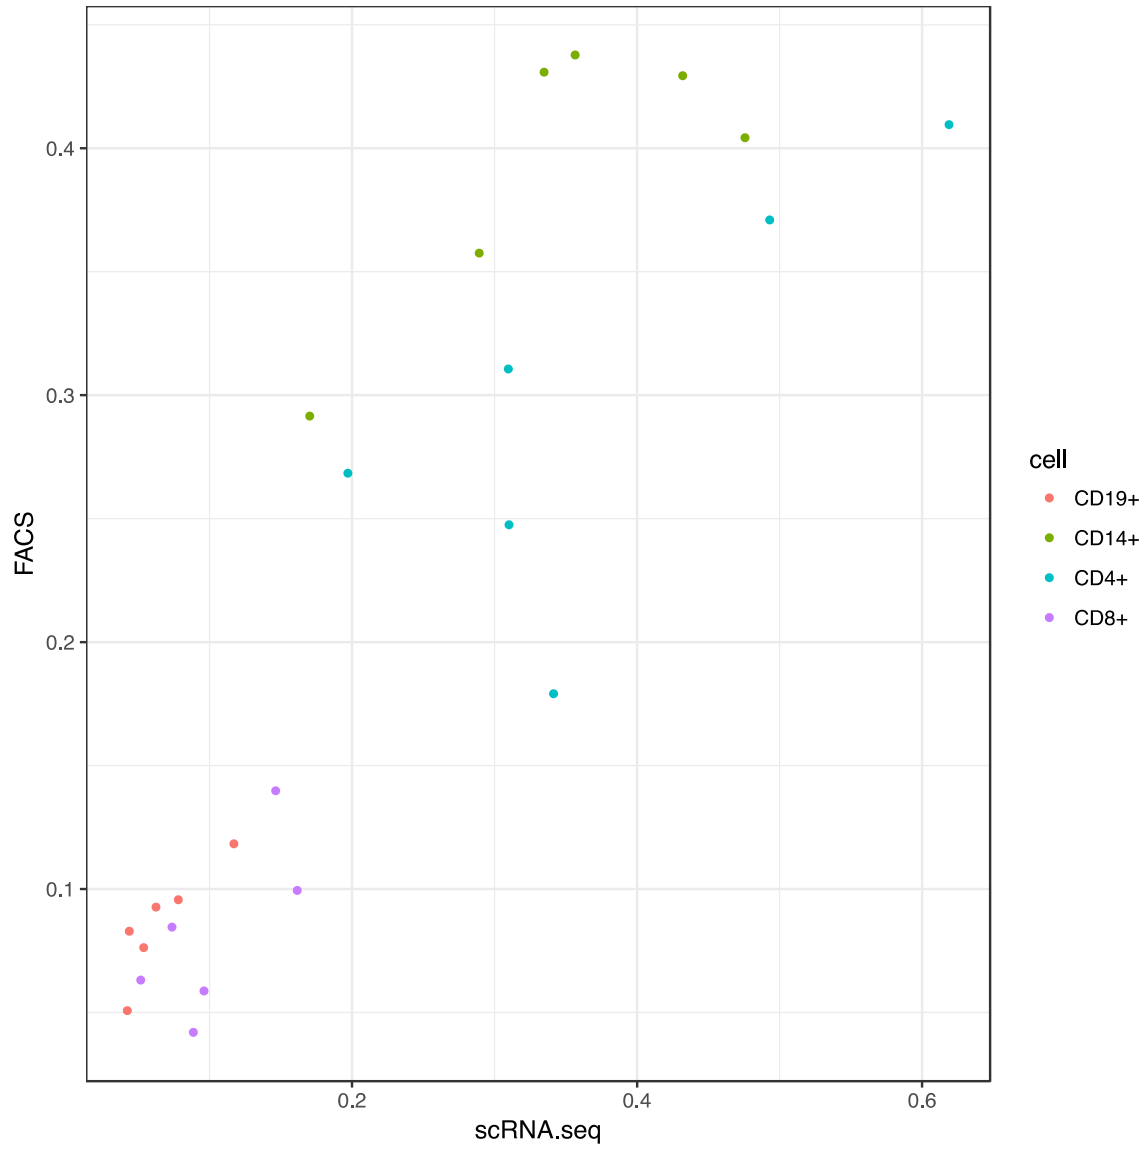

Supplementary Figure 15 – Scatter plot of estimates of cell type proportion from dscRNA-seq (x-axis) and FACS sorting (y-axis) for 6 lupus patients after IFN-beta stimulation.

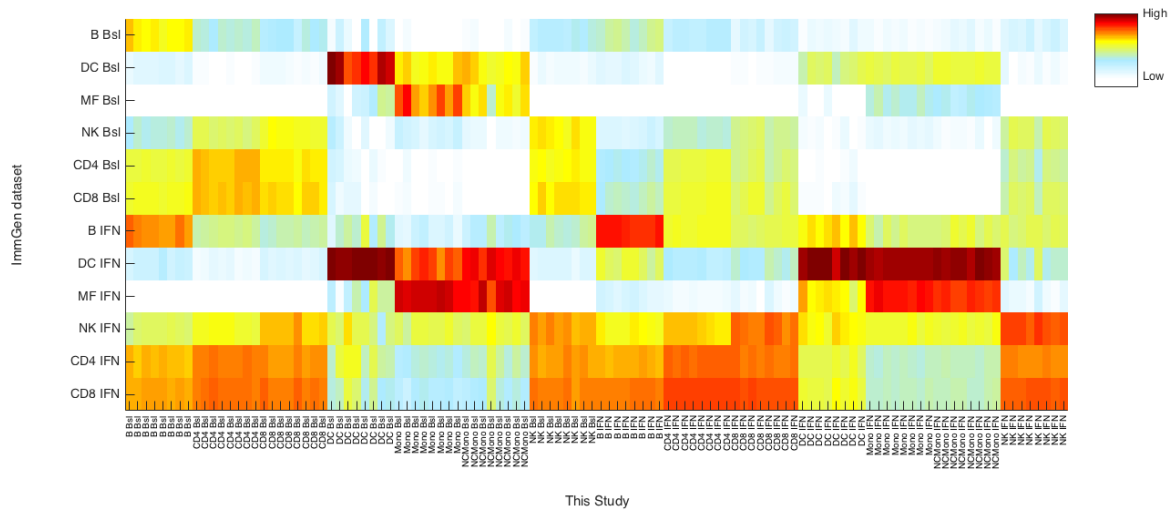

Supplementary Figure 16 – Gene expression correlation between dscRNA-seq data and ImmGen mouse microarray data.

Average abundance is calculated for each cell-type by stimulation. ~2000 homologous genes are used.

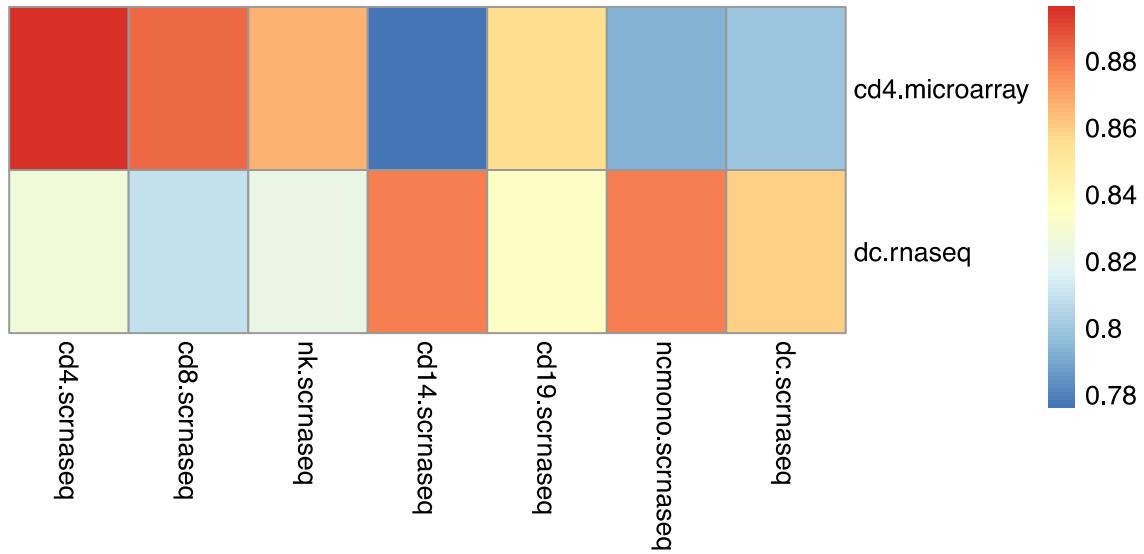

Supplementary Figure 17 – Correlation of foldChange before and after IFN-beta stimulation of ~1000 expressed genes between published CD4 microarray (Ye et al., Science) and monocyte derived dendritic cells RNA-seq (Ye et al., unpublished) (y-axis) with dscRNA-seq cell type specific response (x-axis).

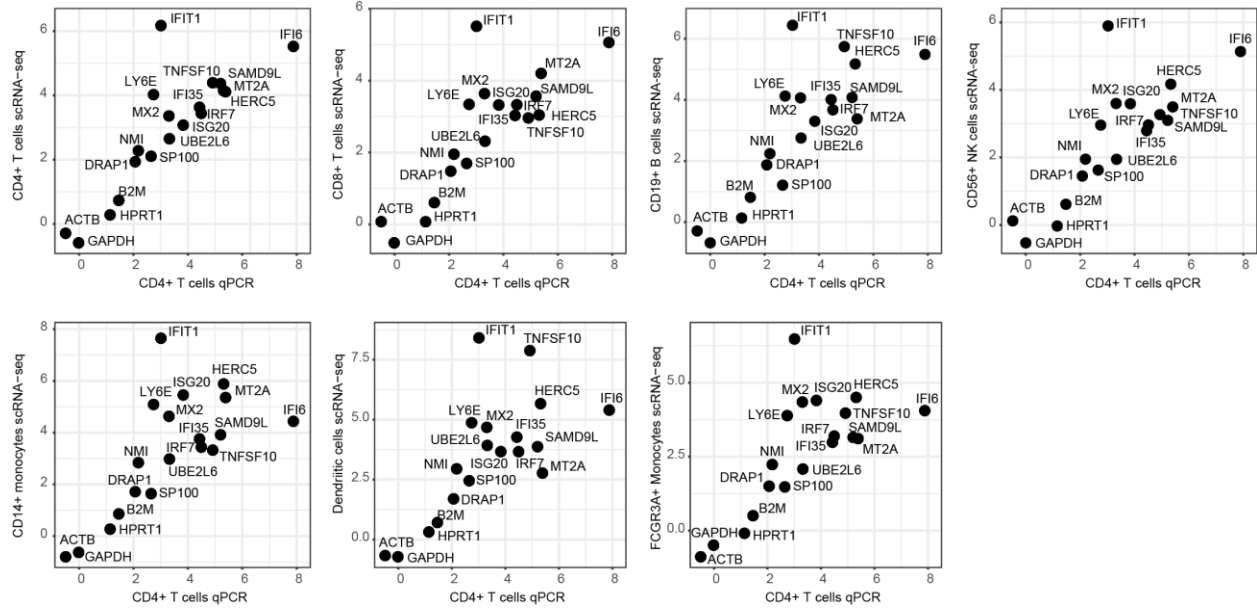

Supplementary Figure 18 – IFN-beta fold change correlation between dscRNA-seq data (y axis) and qPCR data from CD4+ T cells (x axis).

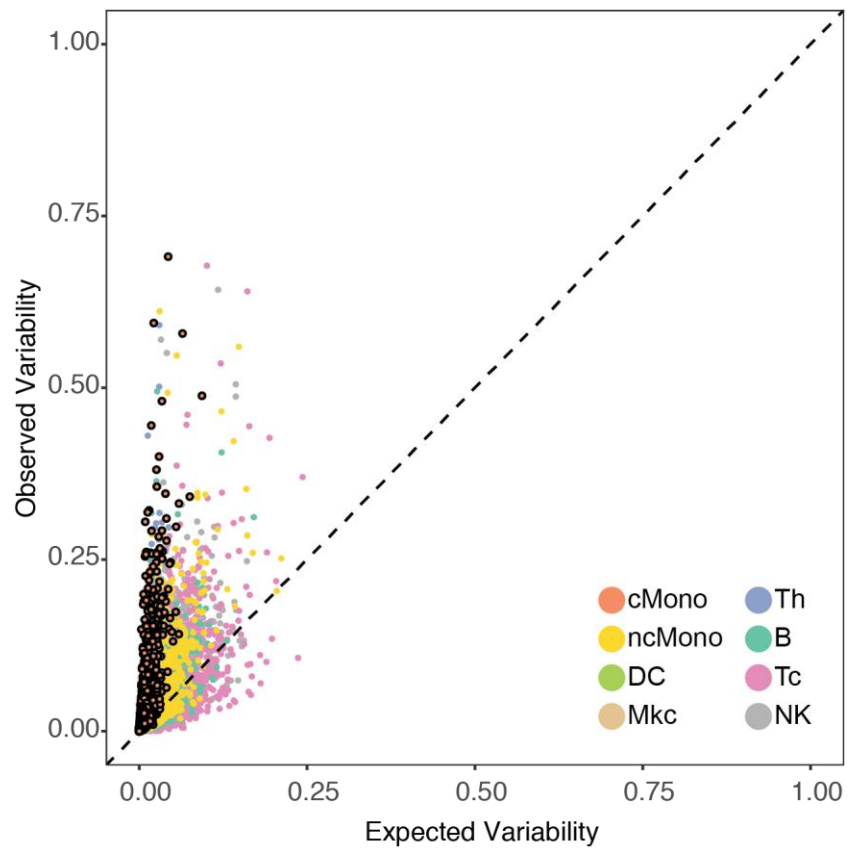

Supplementary Figure 19 – Expected versus observed variability in cell populations. Variance of average expression over single cells across 8 individuals (y) versus variance of average expression over single cells across 8 synthetic replicates matching cell number for each individual (x).

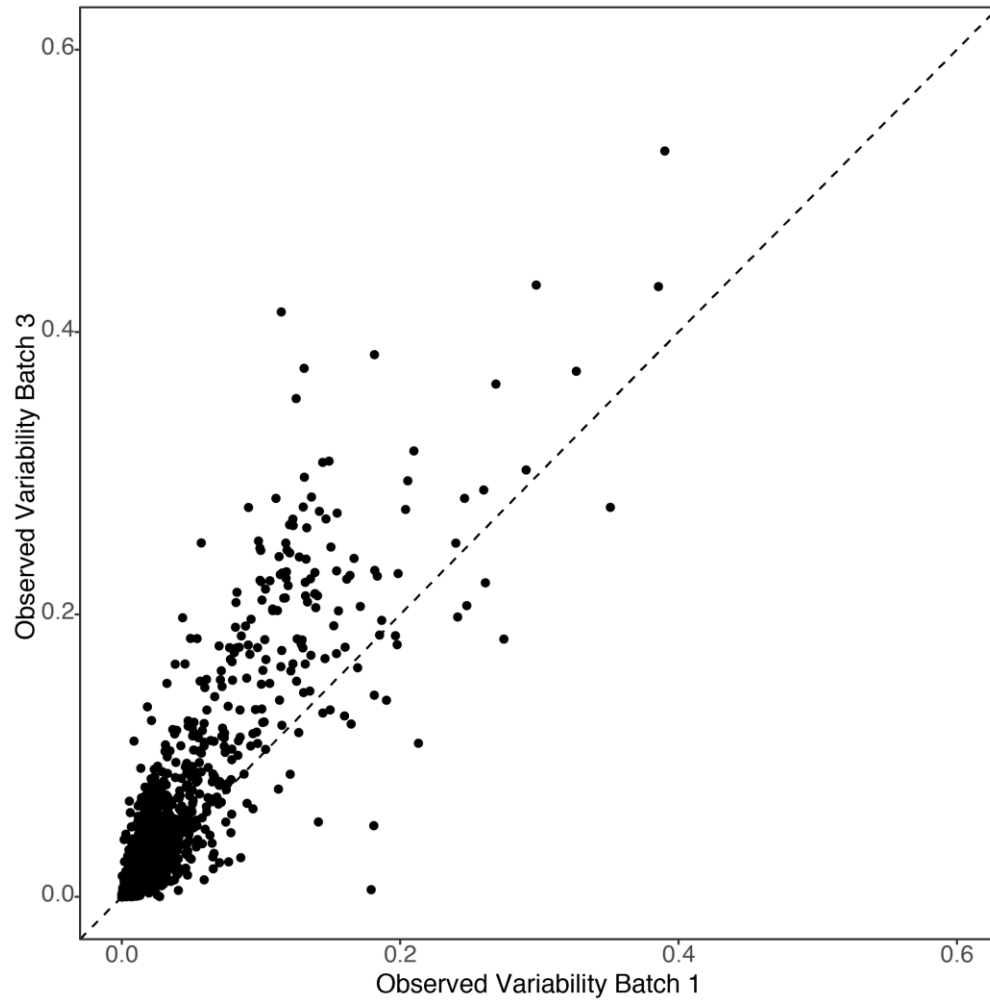

*Supplementary Figure 20* – Observed variability in gene expression is correlated between batches.

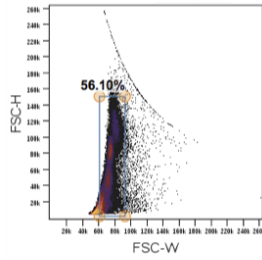

singlet gate  
(parent: live cells)

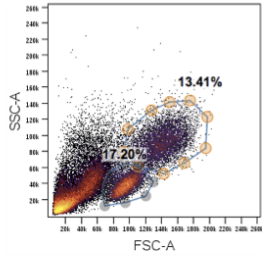

lymphocyte and monocyte  
(parent: singlet)

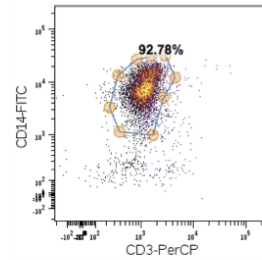

CD14+ monocyte  
(parent: monocyte)

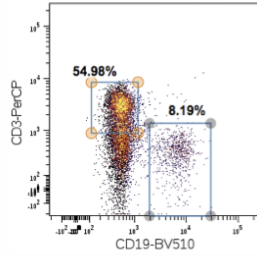

CD3+ and CD19+ (B cells)  
(parent: lymphocyte)

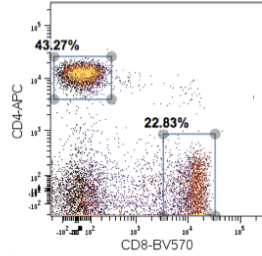

CD4+ and CD8+ (T cells)  
(parent: CD3+)

Supplementary Figure 21 – Example of flow cytometry gating strategy for quantifying immune cell populations.
