# Supplementary material for: Multiplexed droplet single-cell RNA-sequencing using natural genetic variation
Source: Springer Nature journal article supplement (doi:10.1038/nbt.4042), 2017-12-11
Supplement: 41587_2018_BFnbt4042_MOESM6_ESM.pdf [file 41587_2018_BFnbt4042_MOESM6_ESM.pdf]

**Supplementary Table 3.** Conditional probability  $P(b_{ij} | e_{ij}g_i)$  of read  $b_{ij}$  given true genotype  $g_i$ , and read error  $e_{ij}$

| True Genotype $g_i$ | Base Calling Error Event $e_{ij}$ | $\Pr(b_{ij} = A)$ | $\Pr(b_{ij} = B)$ | $\Pr(b_{ij} = E)^b$ |
|---------------------|-----------------------------------|-------------------|-------------------|---------------------|
| $g_i = AA^a$        | $e_{ij} = 0$                      | 1                 | 0                 | 0                   |
|                     | $e_{ij} = 1$                      | 0                 | 1/3               | 2/3                 |
| $g_i = AB^a$        | $e_{ij} = 0$                      | 1/2               | 1/2               | 0                   |
|                     | $e_{ij} = 1$                      | 1/6               | 1/6               | 2/3                 |
| $g_i = BB^a$        | $e_{ij} = 0$                      | 0                 | 1                 | 0                   |
|                     | $e_{ij} = 1$                      | 1/3               | 0                 | 2/3                 |

<sup>a</sup>AA, AB, BB: A allele homozygote, heterozygote, and B allele homozygote

<sup>b</sup>E: alleles other than A or B; assumes four possible alleles (bases)

(from Jun, G. et al. Detecting and Estimating Contamination of Human DNA Samples in Sequencing and Array-Based Genotype Data. *The American Journal of Human Genetics*, Vol. 91 839-848 (2012).)
